# Supplementary material for: SNES: single nucleus exome sequencing
Source: PubMed Central journal article supplement (PMC4373516; doi:10.1186/s13059-015-0616-2), 2015-03-25

Cell Counts

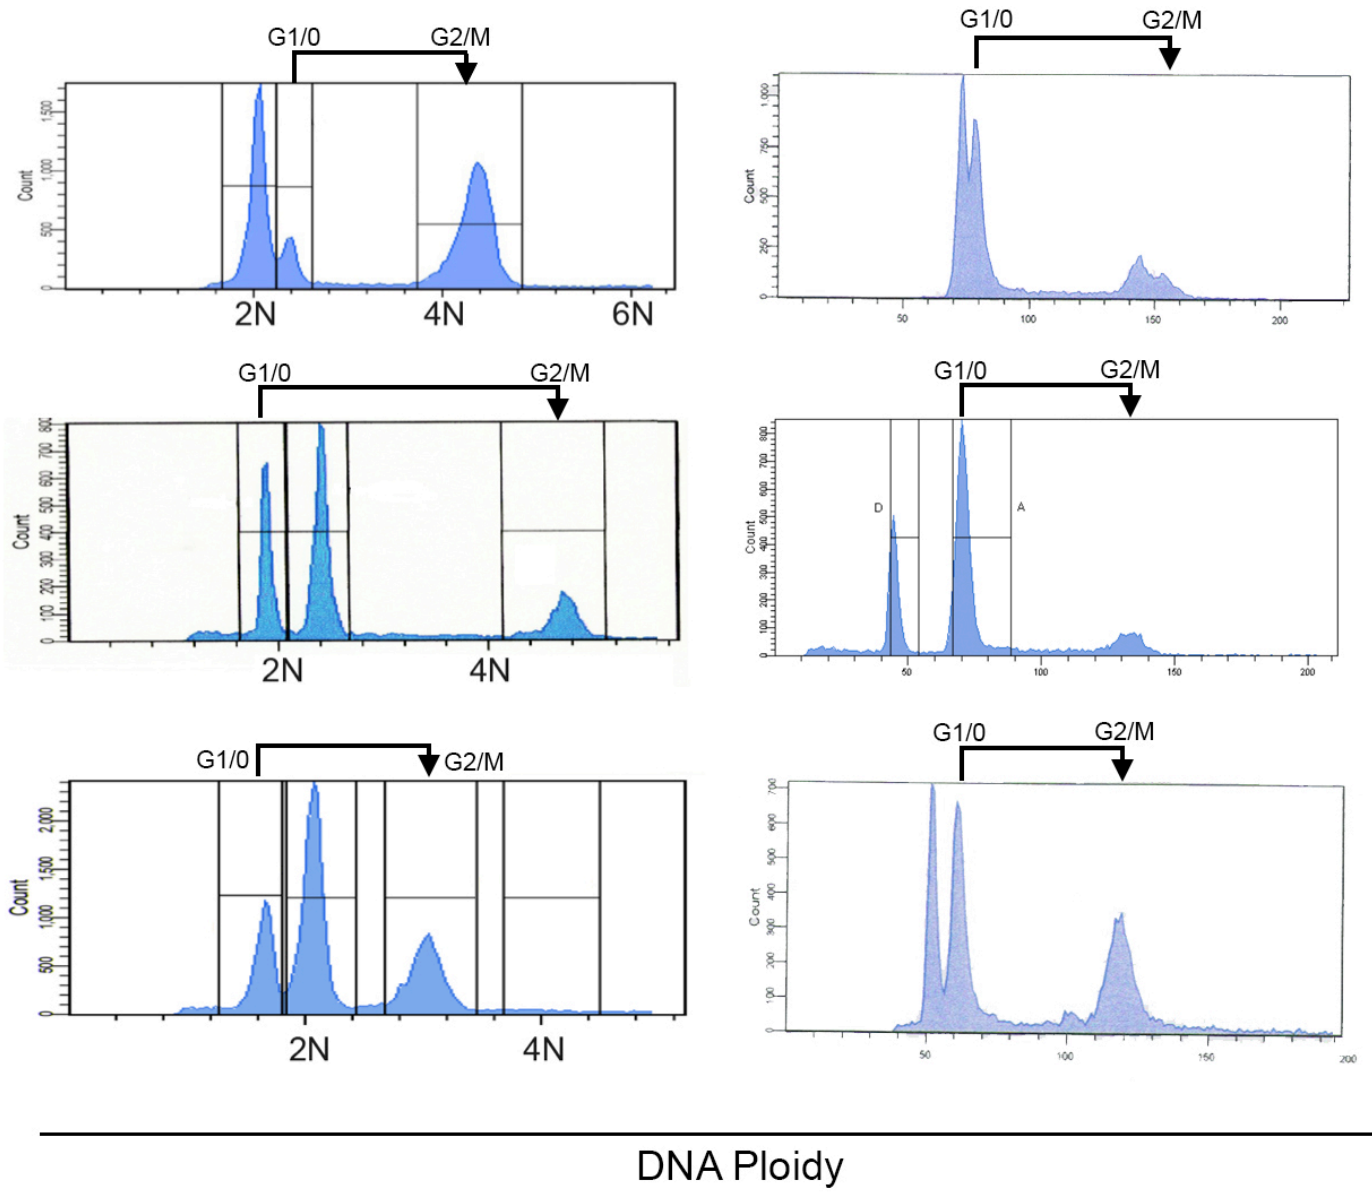

Supplement: 13059_2015_616_MOESM1_ESM.pdf [file 13059_2015_616_MOESM1_ESM.pdf]
