# Supplementary material for: SNES: single nucleus exome sequencing
Source: PubMed Central journal article supplement (PMC4373516; doi:10.1186/s13059-015-0616-2), 2015-03-25
Supplement: 13059_2015_616_MOESM2_ESM.pdf [file 13059_2015_616_MOESM2_ESM.pdf]

**Additional file 2: Table S1 - Chromosome Specific qPCR Primers**

| Name   | Chrom | Orientation | Primer Sequence      |
|--------|-------|-------------|----------------------|
| Chr1F  | 1     | forward     | TCCAAGCTCCAGTTCAGAT  |
| Chr1R  | 1     | reverse     | TGCACTGAGACCTTCACAGG |
| Chr2F  | 2     | forward     | AGCGGGAGGGACTATTTAC  |
| Chr2R  | 2     | reverse     | GGATCGTTCAAAGGGAAGT  |
| Chr3F  | 3     | forward     | CCCTTGACTGGCTCGTGT   |
| Chr3R  | 3     | reverse     | CTTGACATGAAGTCTGGA   |
| Chr4F  | 4     | forward     | GAGCATCTTTGGCTCTGCT  |
| Chr4R  | 4     | reverse     | TTGGGAAAGCACAGATCCTT |
| Chr5F  | 5     | forward     | TTGCAGCTTTCCATTACGTG |
| Chr5R  | 5     | reverse     | CCTTTTATGCCTCCAGCATC |
| Chr6F  | 6     | forward     | GAGGAGGGCAAGGAGAGAGT |
| Chr6R  | 6     | reverse     | ACCCTCCAGTGTGCAAAAAC |
| Chr7F  | 7     | forward     | CTTCCTGCCATTCCACAAGT |
| Chr7R  | 7     | reverse     | CCCCTTTTATGCCTCTGAT  |
| Chr8F  | 8     | forward     | CTTCCCTGCCTTGCTCTCTA |
| Chr8R  | 8     | reverse     | CGGGACATTTACGAATCCTT |
| Chr9F  | 9     | forward     | CTGTGGAGCAGCTGTTTCTG |
| Chr9R  | 9     | reverse     | GAATTCACAAAGCCCCAAGA |
| Chr10F | 10    | forward     | CCCCTCATTCAAATCAGCAT |
| Chr10R | 10    | reverse     | CAGGCAAAAGCTGGAGTTTC |
| Chr11F | 11    | forward     | AGCATCATCCAGCCCATTAC |
| Chr11R | 11    | reverse     | AAATCCCTGCAGAGCAGTGT |
| Chr12F | 12    | forward     | ATCATGGAAATGCAGCCTCT |
| Chr12R | 12    | reverse     | AGAACCCAGCTGGAATGATG |
| Chr13F | 13    | forward     | TGTTTCATGGAGTCTGCTG  |
| Chr13R | 13    | reverse     | GGAGGCAAGAACCAAACAAA |
| Chr14F | 14    | forward     | AGCCAAGACGTACCCTCTCA |
| Chr14R | 14    | reverse     | TGCTTTACACCAATCCCACA |
| Chr15F | 15    | forward     | TCAGCATGGGTTATGGGTTT |
| Chr15R | 15    | reverse     | CCCAGATGATGGAGAGGAAA |
| Chr16F | 16    | forward     | GCCTGTGTTTGCTGATGAAA |
| Chr16R | 16    | reverse     | GGGCAACGACCGTACTTAAA |
| Chr17F | 17    | forward     | TCCTGGGCTAGCCTTTTACA |
| Chr17R | 17    | reverse     | ATCGCTTGAGCACTGAAGGT |
| Chr18F | 18    | forward     | AGACGAGCCTTTCTCTGTG  |
| Chr18R | 18    | reverse     | TCGAGACCATCCCCACTAAC |
| Chr19F | 19    | forward     | TACTCAAAGCTGGCAGCAGA |
| Chr19R | 19    | reverse     | GAGCATGCCAGGATACCTA  |
| Chr20F | 20    | forward     | CACCAGGGTCTTGATGGAGT |
| Chr20R | 20    | reverse     | AGCTCTGGGATCTGTGATGG |
| Chr21F | 21    | forward     | TGGACAAATAAAGGCAATGG |
| Chr21R | 21    | reverse     | TCAGGCAACTTCTGGATGAA |
| Chr22F | 22    | forward     | CTAGGATCCCGTGAAGGTCA |
| Chr22R | 22    | reverse     | AGGTAAGGGGACTCCTTGGT |
