# Supplementary material for: SNES: single nucleus exome sequencing
Source: PubMed Central journal article supplement (PMC4373516; doi:10.1186/s13059-015-0616-2), 2015-03-25
Supplement: 13059_2015_616_MOESM3_ESM.pdf [file 13059_2015_616_MOESM3_ESM.pdf]

Additional file 3: Table S2 - Single Nuclei Exome Sequencing Metrics

| Cell ID | Sample ID | cell type  | Gate | Coverage Depth | Coverage Breadth | on-target | off-target | Mapped reads | Duplicates | Duplicate Fraction |
|---------|-----------|------------|------|----------------|------------------|-----------|------------|--------------|------------|--------------------|
| cell1   | SKN2-3    | fibroblast | G1/0 | 92             | 0.9656           | 0.694434  | 0.305566   | 75807655     | 4499437    | 0.0593533          |
| cell2   | SKN2-1    | fibroblast | G1/0 | 86             | 0.9597           | 0.725463  | 0.274537   | 116959349    | 6840425    | 0.0584855          |
| cell3   | SKN2-8    | fibroblast | G1/0 | 63             | 0.8734           | 0.698274  | 0.301726   | 83050018     | 4272458    | 0.0514444          |
| cell4   | SKN2-9    | fibroblast | G1/0 | 61             | 0.9199           | 0.717339  | 0.282661   | 130394134    | 7879773    | 0.0604304          |
| cell5   | SKN2-2    | fibroblast | G1/0 | 60             | 0.9265           | 0.683081  | 0.316919   | 82702966     | 4637801    | 0.0560778          |
| cell6   | SKN2-6    | fibroblast | G1/0 | 58             | 0.881            | 0.692569  | 0.307431   | 79167508     | 4133589    | 0.0522132          |
| cell7   | SKN2-5    | fibroblast | G1/0 | 57             | 0.808            | 0.710105  | 0.289895   | 81729806     | 4740215    | 0.0579986          |
| cell8   | SKN2-7    | fibroblast | G1/0 | 57             | 0.8964           | 0.697603  | 0.302397   | 88341020     | 4853585    | 0.0549415          |
| cell9   | SKN2-4    | fibroblast | G1/0 | 54             | 0.8335           | 0.683449  | 0.316551   | 78950029     | 4716958    | 0.0597461          |
| cell10  | SKN2-1    | fibroblast | G2/M | 83             | 0.9768           | 0.717238  | 0.282762   | 113932151    | 6674671    | 0.0585846          |
| cell11  | SKN2-4    | fibroblast | G2/M | 81             | 0.9758           | 0.706091  | 0.293909   | 79911960     | 4682799    | 0.0585995          |
| cell12  | SKN2-3    | fibroblast | G2/M | 76             | 0.9729           | 0.707748  | 0.292252   | 75800320     | 3599405    | 0.0474854          |
| cell13  | SKN2-7    | fibroblast | G2/M | 67             | 0.956            | 0.681542  | 0.318458   | 80648480     | 3964360    | 0.049156           |
| cell14  | SKN2-2    | fibroblast | G2/M | 60             | 0.9709           | 0.688752  | 0.311248   | 82272279     | 4248310    | 0.0516372          |
| cell15  | SKN2-8    | fibroblast | G2/M | 60             | 0.9571           | 0.703352  | 0.296648   | 66219143     | 3081922    | 0.0465413          |
| cell16  | SKN2-9    | fibroblast | G2/M | 58             | 0.9537           | 0.692903  | 0.307097   | 112665033    | 6590337    | 0.058495           |
| cell17  | SKN2-6    | fibroblast | G2/M | 56             | 0.9475           | 0.678661  | 0.321339   | 92501465     | 4228379    | 0.0457115          |
| cell18  | SKN2-5    | fibroblast | G2/M | 54             | 0.952            | 0.682259  | 0.317741   | 94910923     | 4911964    | 0.0517534          |
| cell19  | SKN2-10   | fibroblast | G2/M | 47             | 0.9315           | 0.68334   | 0.31666    | 103888986    | 5685038    | 0.0547222          |
