# Supplementary material for: SNES: single nucleus exome sequencing
Source: Genome Biol. 2015 Mar 25;16(1):55. doi: 10.1186/s13059-015-0616-2 (PMC4373516; doi:10.1186/s13059-015-0616-2)
Supplement: Additional file 7: Figure S5. — Distribution of recurrent allelic dropout events along chromosomes. The frequency of allelic dropout errors observed in each single cell are plotted along each chromosome. Many ADO events are recurrent, occurring in multiple single cells. [file 13059_2015_616_MOESM7_ESM.pdf]

chromosome 13

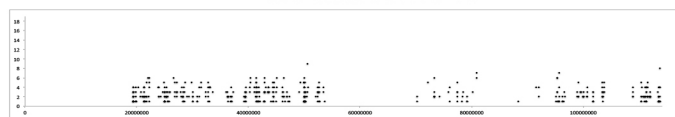

chromosome 14

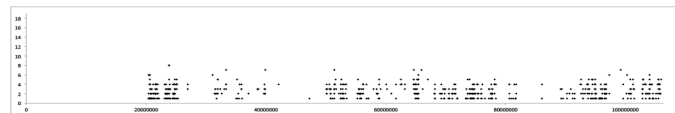

chromosome 15

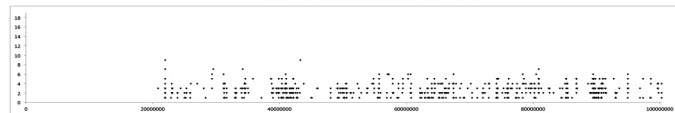

chromosome 16

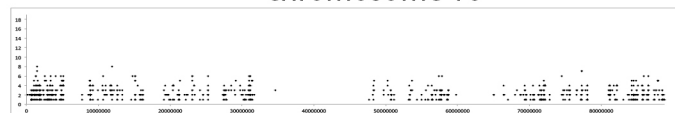

chromosome 17

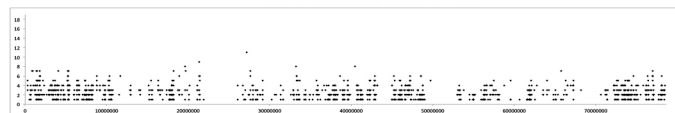

chromosome 18

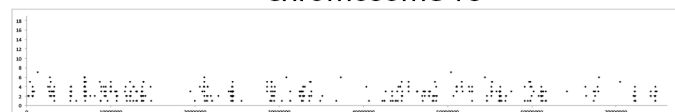

chromosome 19

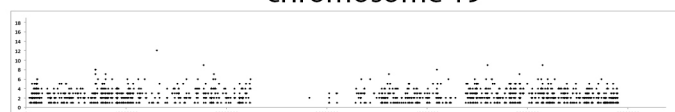

chromosome 20

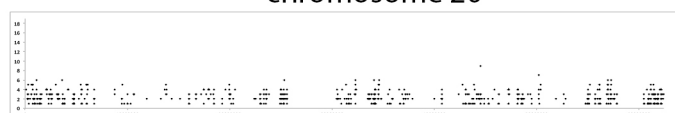

chromosome 21

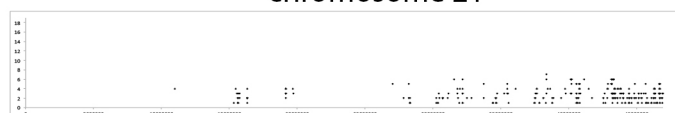

chromosome 22

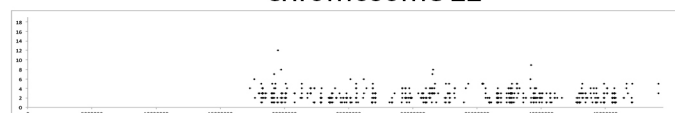

chromosome X

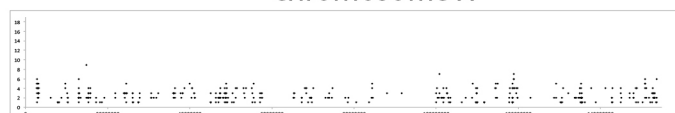

chromosome position (bp)

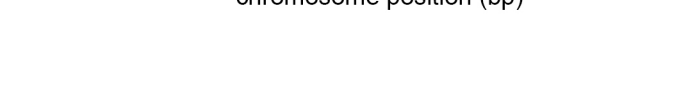

chromosome position (bp)
